# Supplementary material
Source: PubMed Central journal article supplement (PMC9088457)
Supplement: PEP2-114-0-s002.pdf [file PEP2-114-0-s002.pdf]

Supporting Information for

# Computational Design of Stapled Peptide Inhibitor against SARS-CoV-2 Receptor Binding Domain

Asha Rani Choudhury, Atanu Maity, Sayantani Chakraborty and Rajarshi Chakrabarti\*

Department of Chemistry, Indian Institute of Technology Bombay, Powai, Mumbai-400076

E-mail: [rajarshi@chem.iitb.ac.in](mailto:rajarshi@chem.iitb.ac.in)

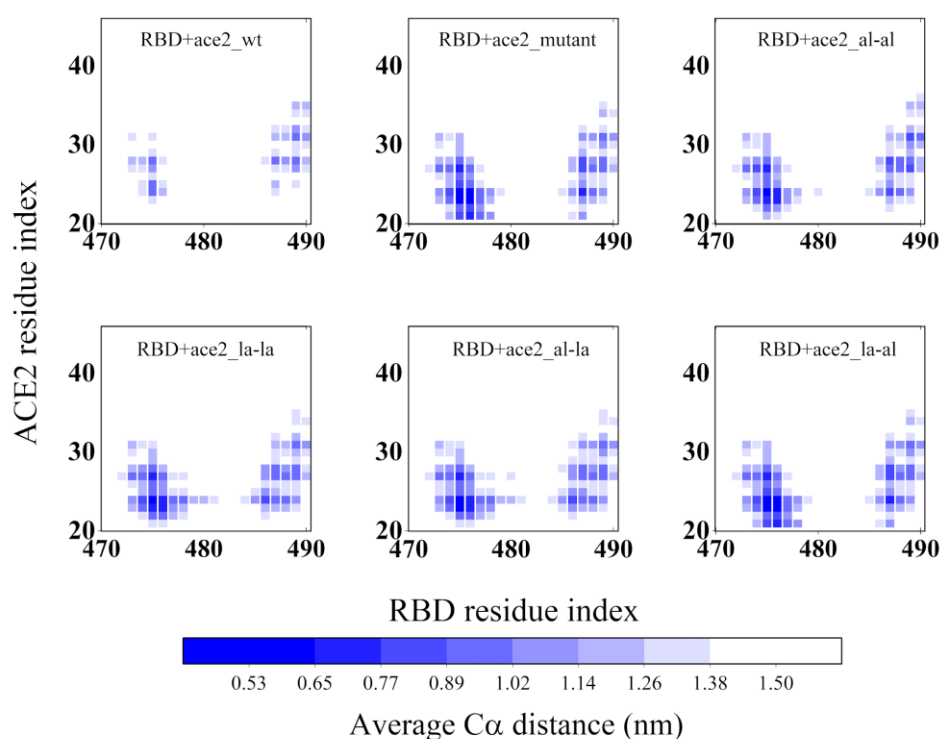

**Figure S1:** The contact maps between ACE2-peptide and RBD for different peptides bound to RBD. The average distance between the alpha carbons of the amino acids of ACE2-peptides and the loop region of RBD (470 to 490) are plotted using a blue-to-white color scale. The blue colored sections represent smaller distances between the residues and hence higher contact whereas residue pairs appearing in white colored sections are at a larger distance therefore forming weaker contacts.

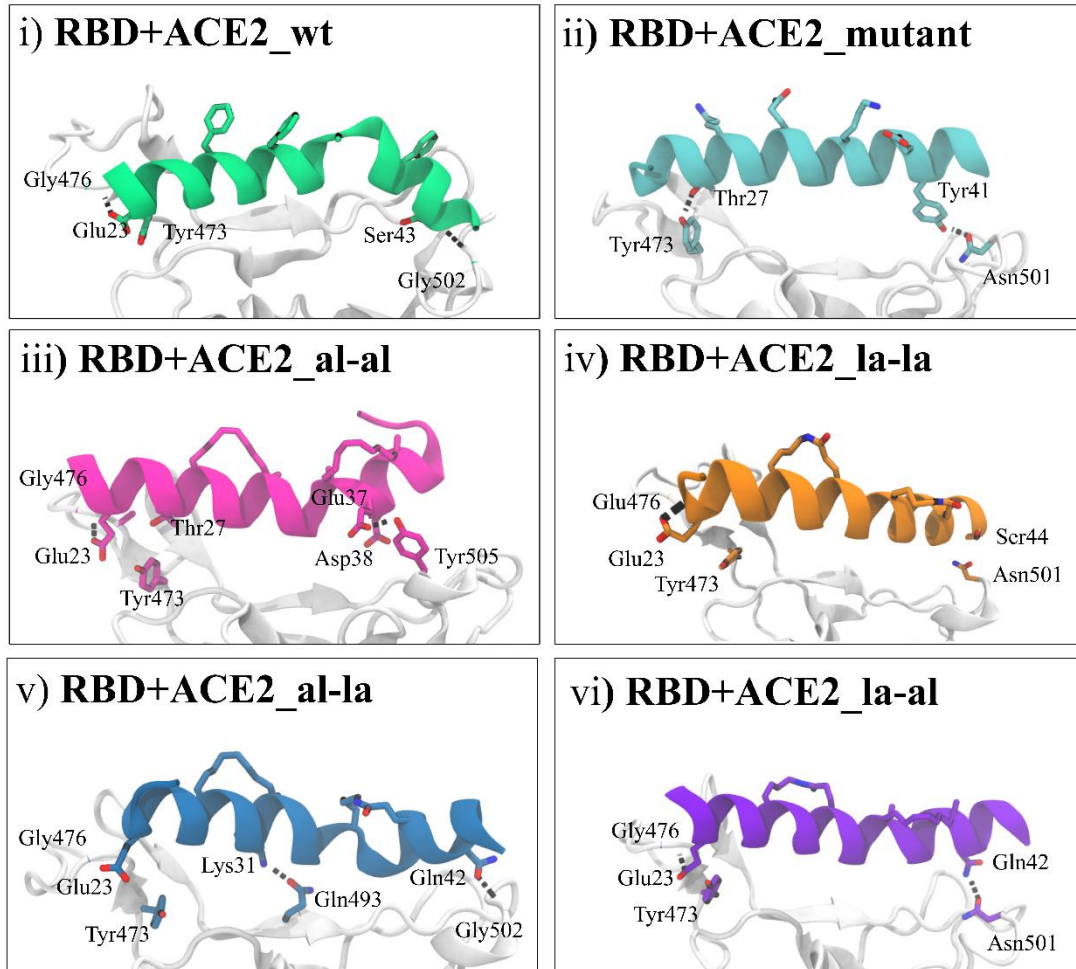

**Figure S2:** The hydrogen bonds between residues (in stick) of RBD (white ribbon) and ACE2-peptides (colored ribbon) are shown for different systems. The hydrogen bonds are shown as black dots.

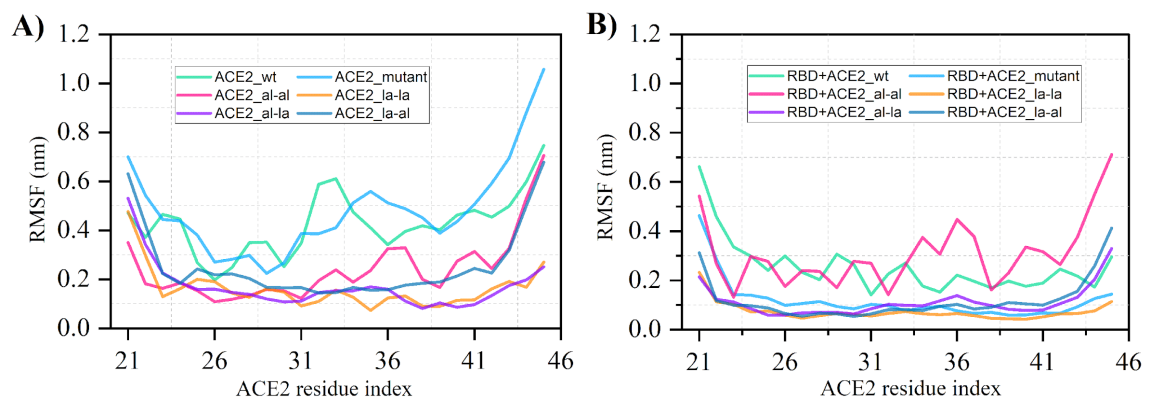

**Figure S3:** The root mean square fluctuation (RMSF) of ACE2 residues for (A) the free peptides and (B) in their complexes with RBD.

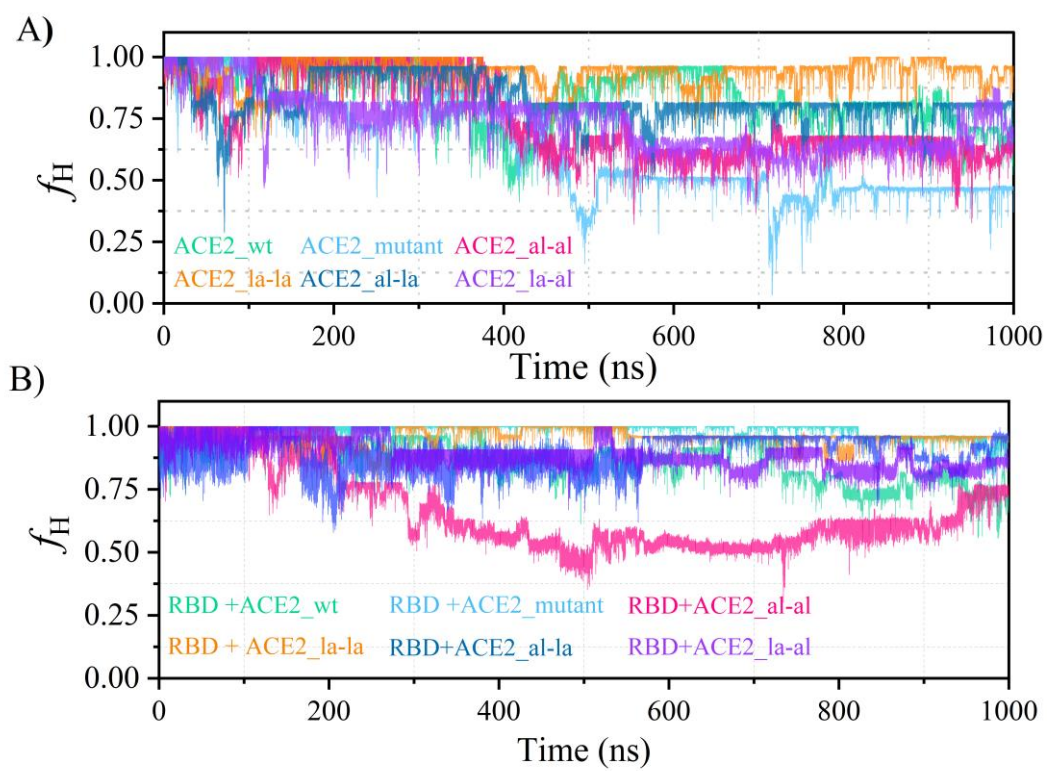

**Figure S4:** The helical fraction of ACE2-peptides in (A) the free states and (B) in their complexes with RBD.

**Table S1:** Binding energy components of **RBD** in three different simulations. All energy values and standard errors are in kcal/mol.

| Energy Components             | Simulation1        | Simulation2        | Simulation3        | Average           |
|-------------------------------|--------------------|--------------------|--------------------|-------------------|
| E <sub>Elec</sub>             | -3,806.58 ± 303.18 | -3,786.82 ± 305.88 | -3,769.62 ± 305.12 | -3,787.67 ± 15.10 |
| E <sub>Vdw</sub>              | -545.85 ± 22.73    | -552.59 ± 23.41    | -550.72 ± 21.78    | -549.72 ± 2.84    |
| E <sub>Internal</sub>         | 4,073.15 ± 40.60   | 4,071.75 ± 40.72   | 4,071.54 ± 40.77   | 4,072.15 ± 0.71   |
| E <sub>Solv(polar)</sub>      | -2,217.49 ± 297.56 | -2,232.67 ± 301.20 | -2,238.67 ± 299.70 | -2,229.61 ± 8.91  |
| E <sub>Solv(non-polar)</sub>  | 65.42 ± 0.95       | 64.70 ± 1.07       | 65.56 ± 0.83       | 65.22 ± 0.38      |
| E <sub>Elec+Solv(polar)</sub> | -6,024.07 ± 24.03  | -6,019.49 ± 23.83  | -6,008.29 ± 23.67  | -6,017.28 ± 6.63  |
| H                             | -2,431.34 ± 39.73  | -2,435.62 ± 41.07  | -2,421.92 ± 39.83  | -2,429.63 ± 5.72  |
| -TS                           | -863.35            | -899.67            | -866.62            | -876.55 ± 16.40   |

**Table S2:** Binding energy components of **RBD+ACE2\_wt** in three different simulations. All energy values and standard errors are in kcal/mol.

| Energy Components             | Simulation1        | Simulation2        | Simulation3        | Average           |
|-------------------------------|--------------------|--------------------|--------------------|-------------------|
| E <sub>Elec</sub>             | -4,467.63 ± 350.29 | -4,310.30 ± 366.47 | -4,351.86 ± 359.34 | -4,376.60 ± 66.57 |
| E <sub>Vdw</sub>              | -611.79 ± 23.20    | -601.10 ± 25.18    | -612.42 ± 24.92    | -608.44 ± 5.19    |
| E <sub>Internal</sub>         | 4,662.87 ± 43.67   | 4,660.95 ± 43.91   | 4,664.46 ± 44.18   | 4,662.76 ± 1.44   |
| E <sub>Solv(polar)</sub>      | -2,619.31 ± 343.62 | -2,770.17 ± 359.26 | -2,729.11 ± 352.70 | -2,706.20 ± 63.68 |
| E <sub>Solv(non-polar)</sub>  | 76.18 ± 0.93       | 76.65 ± 1.12       | 76.24 ± 1.09       | 76.35 ± 0.21      |
| E <sub>Elec+Solv(polar)</sub> | -7,086.94 ± 26.98  | -7,080.47 ± 25.71  | -7,080.97 ± 26.89  | -7,082.79 ± 2.94  |
| H                             | -2,959.67 ± 43.25  | -2,943.98 ± 43.77  | -2,952.69 ± 44.12  | -2,952.11 ± 6.42  |
| -TS                           | -997.11            | -1,015.73          | -996.89            | -1,003.24 ± 8.83  |

**Table S3:** Binding energy components of **RBD+ACE2\_mutant** in three different simulations. All energy values and standard errors are in kcal/mol.

| Energy Components             | simulation1        | simulation2        | simulation3        | Average           |
|-------------------------------|--------------------|--------------------|--------------------|-------------------|
| E <sub>Elec</sub>             | -4,431.40 ± 354.15 | -4,478.70 ± 356.51 | -4,389.58 ± 350.60 | -4,433.23 ± 36.41 |
| E <sub>Vdw</sub>              | -648.31 ± 22.87    | -660.23 ± 23.69    | -630.71 ± 23.67    | -646.41 ± 12.13   |
| E <sub>Internal</sub>         | 4,631.40 ± 43.72   | 4,644.78 ± 43.70   | 4,633.05 ± 43.35   | 4,636.41 ± 5.96   |
| E <sub>Solv(polar)</sub>      | -2,933.45 ± 346.48 | -2,907.71 ± 350.49 | -2,987.06 ± 344.68 | -2,942.74 ± 33.05 |
| E <sub>Solv(non-polar)</sub>  | 75.59 ± 0.92       | 74.64 ± 0.94       | 76.83 ± 0.97       | 75.69 ± 0.90      |
| E <sub>Elec+Solv(polar)</sub> | -7,364.85 ± 26.76  | -7,386.41 ± 26.08  | -7,376.64 ± 25.81  | -7,375.97 ± 8.81  |
| H                             | -3,306.17 ± 43.01  | -3,327.21 ± 43.68  | -3,297.47 ± 43.07  | -3,310.28 ± 12.48 |
| -TS                           | -998.82            | -996.54            | -992.02            | -995.79 ± 2.83    |

**Table S4:** Binding energy components of **RBD+ACE2\_al-al** in three different simulations. All energy values and standard errors are in kcal/mol.

| Energy Components             | simulation1        | simulation2        | simulation3        | Average           |
|-------------------------------|--------------------|--------------------|--------------------|-------------------|
| E <sub>Elec</sub>             | -4,172.79 ± 361.79 | -4,370.40 ± 350.80 | -4,376.29 ± 339.51 | -4,306.49 ± 94.57 |
| E <sub>Vdw</sub>              | -640.65 ± 24.65    | -646.11 ± 24.12    | -645.03 ± 24.16    | -643.93 ± 2.36    |
| E <sub>Internal</sub>         | 4,684.43 ± 44.05   | 4,683.97 ± 43.46   | 4,677.10 ± 43.76   | 4,681.83 ± 3.35   |
| E <sub>Solv(polar)</sub>      | -2,854.44 ± 357.25 | -2,677.61 ± 343.69 | -2,658.79 ± 333.78 | -2,730.28 ± 88.13 |
| E <sub>Solv(non-polar)</sub>  | 75.64 ± 0.99       | 74.50 ± 0.95       | 75.62 ± 1.00       | 75.25 ± 0.53      |
| E <sub>Elec+Solv(polar)</sub> | -7,027.23 ± 24.84  | -7,048.01 ± 27.23  | -7,035.08 ± 25.47  | -7,036.77 ± 8.57  |
| H                             | -2,907.82 ± 43.32  | -2,935.65 ± 43.44  | -2,927.39 ± 43.01  | -2,923.62 ± 11.67 |
| -TS                           | -990.80            | -1004.49           | -1,023.49          | -1006.26 ± 13.40  |

**Table S5:** Binding energy components of **RBD+ACE2\_la-la** in three different simulations. All energy values and standard errors are in kcal/mol.

| Energy Components             | simulation1            | simulation2            | simulation3            | Average               |
|-------------------------------|------------------------|------------------------|------------------------|-----------------------|
| $E_{\text{Elec}}$             | $-4,346.24 \pm 352.11$ | $-4,552.89 \pm 356.37$ | $-4,402.40 \pm 364.36$ | $-4,433.84 \pm 87.25$ |
| $E_{\text{Vdw}}$              | $-648.59 \pm 23.37$    | $-653.64 \pm 23.66$    | $-651.61 \pm 26.67$    | $-651.28 \pm 2.07$    |
| $E_{\text{Internal}}$         | $4,645.75 \pm 43.85$   | $4,644.80 \pm 43.80$   | $4,647.02 \pm 43.56$   | $4,645.86 \pm 0.91$   |
| $E_{\text{Solv(polar)}}$      | $-2,850.91 \pm 345.80$ | $-2,645.43 \pm 350.09$ | $-2,787.74 \pm 359.31$ | $-2,761.36 \pm 85.94$ |
| $E_{\text{Solv(non-polar)}}$  | $75.25 \pm 0.95$       | $74.17 \pm 0.94$       | $75.00 \pm 1.26$       | $74.81 \pm 0.46$      |
| $E_{\text{Elec+Solv(polar)}}$ | $-7,197.15 \pm 25.69$  | $-7,198.32 \pm 26.35$  | $-7,190.14 \pm 27.12$  | $-7,195.20 \pm 3.61$  |
| <b>H</b>                      | $-3,124.74 \pm 43.29$  | $-3,132.98 \pm 42.86$  | $-3,119.73 \pm 44.81$  | $-3,125.82 \pm 5.46$  |
| <b>-TS</b>                    | $-997.12$              | $-994.47$              | $-966.15$              | $-985.91 \pm 14.02$   |

**Table S6:** Binding energy components of **RBD+ACE2\_al-la** in three different simulations. All energy values and standard errors are in kcal/mol.

| Energy Components             | simulation1            | simulation2            | simulation3            | Average                |
|-------------------------------|------------------------|------------------------|------------------------|------------------------|
| $E_{\text{Elec}}$             | $-4,260.50 \pm 366.82$ | $-4,207.51 \pm 342.74$ | $-4,513.91 \pm 344.28$ | $-4,327.31 \pm 133.71$ |
| $E_{\text{Vdw}}$              | $-623.80 \pm 23.49$    | $-630.04 \pm 27.03$    | $-647.49 \pm 23.48$    | $-633.78 \pm 10.02$    |
| $E_{\text{Internal}}$         | $4,662.14 \pm 43.59$   | $4,661.76 \pm 43.82$   | $4,669.79 \pm 43.50$   | $4,664.56 \pm 3.70$    |
| $E_{\text{Solv(polar)}}$      | $-2,854.24 \pm 357.84$ | $-2,913.86 \pm 336.54$ | $-2,613.68 \pm 338.53$ | $-2,793.93 \pm 129.76$ |
| $E_{\text{Solv(non-polar)}}$  | $76.81 \pm 0.99$       | $76.47 \pm 1.27$       | $74.42 \pm 0.88$       | $75.90 \pm 1.05$       |
| $E_{\text{Elec+Solv(polar)}}$ | $-7,114.74 \pm 27.57$  | $-7,121.37 \pm 26.01$  | $-7,127.59 \pm 25.41$  | $-7,121.23 \pm 5.25$   |
| <b>H</b>                      | $-2,999.60 \pm 43.08$  | $-3,013.19 \pm 45.16$  | $-3,030.86 \pm 43.24$  | $-3,014.55 \pm 12.80$  |
| <b>-TS</b>                    | $-1,021.55$            | $-999.96$              | $-985.45$              | $-1002.32 \pm 14.83$   |

**Table S7:** Binding energy components of **RBD+ACE2\_la-al** in three different simulations. All energy values and standard errors are in kcal/mol.

| Energy Components             | simulation1            | simulation2            | simulation3            | Average               |
|-------------------------------|------------------------|------------------------|------------------------|-----------------------|
| $E_{\text{Elec}}$             | $-4,437.03 \pm 358.56$ | $-4,469.12 \pm 349.38$ | $-4,406.19 \pm 345.09$ | $-4,437.45 \pm 25.69$ |
| $E_{\text{Vdw}}$              | $-638.32 \pm 23.82$    | $-661.21 \pm 23.28$    | $-638.74 \pm 23.56$    | $-646.09 \pm 10.70$   |
| $E_{\text{Internal}}$         | $4,674.81 \pm 43.81$   | $4,661.90 \pm 43.33$   | $4,665.56 \pm 43.33$   | $4,667.42 \pm 5.43$   |
| $E_{\text{Solv(polar)}}$      | $-2,703.36 \pm 352.53$ | $-2,635.71 \pm 343.79$ | $-2,710.20 \pm 338.79$ | $-2,683.09 \pm 33.62$ |
| $E_{\text{Solv(non-polar)}}$  | $75.22 \pm 0.98$       | $74.37 \pm 0.95$       | $76.06 \pm 0.93$       | $75.22 \pm 0.69$      |
| $E_{\text{Elec+Solv(polar)}}$ | $-7,140.39 \pm 25.74$  | $-7,104.83 \pm 25.97$  | $-7,116.39 \pm 26.21$  | $-7,120.54 \pm 14.81$ |
| <b>H</b>                      | $-3,028.67 \pm 42.80$  | $-3,029.77 \pm 42.38$  | $-3,013.51 \pm 42.66$  | $-3,023.98 \pm 7.42$  |
| <b>-TS</b>                    | $-987.53$              | $-995.00$              | $-1012.40$             | $-998.31 \pm 10.42$   |

**Table S8:** Binding energy components of **ACE2\_wt** in three different simulations. All energy values and standard errors are in kcal/mol.

| Energy Components             | simulation1          | simulation2          | simulation3          | Average              |
|-------------------------------|----------------------|----------------------|----------------------|----------------------|
| $E_{\text{Elec}}$             | $-315.53 \pm 80.10$  | $-314.60 \pm 77.77$  | $-317.50 \pm 71.42$  | $-315.87 \pm 1.21$   |
| $E_{\text{Vdw}}$              | $-24.96 \pm 7.83$    | $-33.37 \pm 8.22$    | $-25.61 \pm 7.88$    | $-27.98 \pm 3.82$    |
| $E_{\text{Internal}}$         | $571.44 \pm 15.43$   | $572.09 \pm 15.57$   | $569.00 \pm 15.35$   | $570.85 \pm 1.33$    |
| $E_{\text{Solv(polar)}}$      | $-726.47 \pm 75.40$  | $-717.26 \pm 74.69$  | $-721.94 \pm 67.30$  | $-721.89 \pm 3.76$   |
| $E_{\text{Solv(non-polar)}}$  | $12.92 \pm 0.26$     | $12.37 \pm 0.32$     | $12.88 \pm 0.25$     | $12.73 \pm 0.25$     |
| $E_{\text{Elec+Solv(polar)}}$ | $-1,042.49 \pm 9.85$ | $-1,031.86 \pm 9.04$ | $-1,039.44 \pm 9.39$ | $-1,037.77 \pm 4.31$ |
| <b>H</b>                      | $-482.60 \pm 16.03$  | $-480.76 \pm 15.52$  | $-483.17 \pm 15.69$  | $-482.17 \pm 1.03$   |
| <b>-TS</b>                    | $-153.24$            | $-182.84$            | $-109.92$            | $-148.66 \pm 29.94$  |

**Table S9:** Binding energy components of **ACE2\_mutant** in three different simulations. All energy values and standard errors are in kcal/mol.

| Energy Components             | simulation1           | simulation2          | simulation3          | Average              |
|-------------------------------|-----------------------|----------------------|----------------------|----------------------|
| $E_{\text{Elec}}$             | $-382.76 \pm 98.19$   | $-371.78 \pm 83.70$  | $-363.53 \pm 85.82$  | $-372.69 \pm 7.88$   |
| $E_{\text{Vdw}}$              | $-54.18 \pm 8.70$     | $-62.76 \pm 7.99$    | $-59.06 \pm 7.62$    | $-58.67 \pm 3.51$    |
| $E_{\text{Internal}}$         | $565.78 \pm 15.39$    | $565.64 \pm 15.38$   | $564.31 \pm 15.44$   | $565.24 \pm 0.66$    |
| $E_{\text{Solv(polar)}}$      | $-966.73 \pm 92.84$   | $-975.32 \pm 79.22$  | $-985.33 \pm 81.45$  | $-975.79 \pm 7.60$   |
| $E_{\text{Solv(non-polar)}}$  | $12.95 \pm 0.32$      | $12.43 \pm 0.24$     | $12.85 \pm 0.25$     | $12.75 \pm 0.23$     |
| $E_{\text{Elec+Solv(polar)}}$ | $-1,349.49 \pm 10.82$ | $-1,347.10 \pm 9.97$ | $-1,348.86 \pm 9.88$ | $-1,348.48 \pm 1.01$ |
| <b>H</b>                      | $-824.93 \pm 15.99$   | $-831.80 \pm 15.34$  | $-830.75 \pm 15.63$  | $-829.16 \pm 3.02$   |
| <b>-TS</b>                    | -192.04               | -121.83              | -127.36              | $-147.08 \pm 31.87$  |

**Table S10:** Binding energy components of **ACE2\_al-al** in three different simulations. All energy values and standard errors are in kcal/mol.

| Energy Components             | simulation1          | simulation2          | simulation3          | Average              |
|-------------------------------|----------------------|----------------------|----------------------|----------------------|
| $E_{\text{Elec}}$             | $-265.04 \pm 78.85$  | $-196.40 \pm 75.69$  | $-211.41 \pm 81.72$  | $-224.28 \pm 29.46$  |
| $E_{\text{Vdw}}$              | $-52.56 \pm 7.82$    | $-46.86 \pm 7.50$    | $-46.27 \pm 8.41$    | $-48.56 \pm 2.83$    |
| $E_{\text{Internal}}$         | $611.87 \pm 15.57$   | $606.26 \pm 15.62$   | $612.00 \pm 16.00$   | $610.04 \pm 2.67$    |
| $E_{\text{Solv(polar)}}$      | $-757.67 \pm 75.32$  | $-811.12 \pm 73.63$  | $-797.71 \pm 77.87$  | $-788.83 \pm 22.70$  |
| $E_{\text{Solv(non-polar)}}$  | $12.50 \pm 0.23$     | $13.07 \pm 0.25$     | $13.18 \pm 0.36$     | $12.92 \pm 0.30$     |
| $E_{\text{Elec+Solv(polar)}}$ | $-1,022.71 \pm 9.10$ | $-1,007.52 \pm 8.10$ | $-1,009.12 \pm 9.93$ | $-1,013.11 \pm 6.81$ |
| <b>H</b>                      | $-450.90 \pm 15.61$  | $-435.04 \pm 15.29$  | $-430.21 \pm 16.39$  | $-438.71 \pm 8.84$   |
| <b>-TS</b>                    | -136.71              | -162.04              | -160.62              | $-153.12 \pm 11.62$  |

**Table S11:** Binding energy components of **ACE2\_la-la** in three different simulations. All energy values and standard errors are in kcal/mol.

| Energy Components             | simulation1           | simulation2          | simulation3           | Average               |
|-------------------------------|-----------------------|----------------------|-----------------------|-----------------------|
| $E_{\text{Elec}}$             | $-382.44 \pm 91.05$   | $-390.62 \pm 79.84$  | $-308.06 \pm 82.47$   | $-360.37 \pm 37.14$   |
| $E_{\text{Vdw}}$              | $-54.17 \pm 8.02$     | $-56.00 \pm 8.03$    | $-52.22 \pm 8.78$     | $-54.13 \pm 1.54$     |
| $E_{\text{Internal}}$         | $576.95 \pm 15.40$    | $573.03 \pm 15.13$   | $572.87 \pm 15.62$    | $574.28 \pm 1.89$     |
| $E_{\text{Solv(polar)}}$      | $-789.86 \pm 84.46$   | $-781.11 \pm 75.74$  | $-840.49 \pm 79.38$   | $-803.82 \pm 26.18$   |
| $E_{\text{Solv(non-polar)}}$  | $12.70 \pm 0.38$      | $12.64 \pm 0.32$     | $13.16 \pm 0.39$      | $12.83 \pm 0.23$      |
| $E_{\text{Elec+Solv(polar)}}$ | $-1,172.30 \pm 11.38$ | $-1,171.73 \pm 9.45$ | $-1,148.55 \pm 11.04$ | $-1,164.19 \pm 11.06$ |
| <b>H</b>                      | $-636.81 \pm 17.37$   | $-642.06 \pm 15.49$  | $-614.75 \pm 16.71$   | $-631.21 \pm 11.83$   |
| <b>-TS</b>                    | -112.07               | -132.04              | -141.22               | $-128.45 \pm 12.17$   |

**Table S12:** Binding energy components of **ACE2\_al-la** in three different simulations. All energy values and standard errors are in kcal/mol.

| Energy Components             | simulation1           | simulation2          | simulation3          | Average              |
|-------------------------------|-----------------------|----------------------|----------------------|----------------------|
| $E_{\text{Elec}}$             | $-334.16 \pm 77.69$   | $-324.17 \pm 76.83$  | $-313.02 \pm 81.20$  | $-323.78 \pm 8.64$   |
| $E_{\text{Vdw}}$              | $-51.03 \pm 8.37$     | $-54.93 \pm 7.70$    | $-54.73 \pm 7.86$    | $-53.56 \pm 1.79$    |
| $E_{\text{Internal}}$         | $590.81 \pm 15.64$    | $596.29 \pm 15.56$   | $596.86 \pm 15.52$   | $594.65 \pm 2.73$    |
| $E_{\text{Solv(polar)}}$      | $-759.35 \pm 73.03$   | $-776.76 \pm 72.79$  | $-785.37 \pm 77.89$  | $-773.83 \pm 10.82$  |
| $E_{\text{Solv(non-polar)}}$  | $12.70 \pm 0.41$      | $12.46 \pm 0.23$     | $12.54 \pm 0.25$     | $12.56 \pm 0.10$     |
| $E_{\text{Elec+Solv(polar)}}$ | $-1,093.52 \pm 10.33$ | $-1,100.94 \pm 9.40$ | $-1,098.39 \pm 8.96$ | $-1,097.61 \pm 3.08$ |
| <b>H</b>                      | $-541.05 \pm 16.77$   | $-547.12 \pm 15.69$  | $-543.73 \pm 15.55$  | $-543.96 \pm 2.48$   |
| <b>-TS</b>                    | -131.94               | -106.62              | -163.70              | $-134.09 \pm 23.35$  |

**Table S13:** Binding energy components of **ACE2\_la-al** in three different simulations. All energy values and standard errors are in kcal/mol.

| Energy Components             | simulation1          | simulation2          | simulation3           | Average              |
|-------------------------------|----------------------|----------------------|-----------------------|----------------------|
| $E_{\text{Elec}}$             | $-301.52 \pm 87.00$  | $-284.33 \pm 80.32$  | $-315.94 \pm 86.53$   | $-300.60 \pm 12.92$  |
| $E_{\text{Vdw}}$              | $-53.86 \pm 8.81$    | $-58.88 \pm 7.96$    | $-52.07 \pm 7.94$     | $-54.93 \pm 2.88$    |
| $E_{\text{Internal}}$         | $592.38 \pm 15.46$   | $594.04 \pm 15.60$   | $590.27 \pm 15.55$    | $592.23 \pm 1.54$    |
| $E_{\text{Solv(polar)}}$      | $-788.75 \pm 83.41$  | $-806.76 \pm 77.03$  | $-774.45 \pm 80.75$   | $-789.99 \pm 13.22$  |
| $E_{\text{Solv(non-polar)}}$  | $12.75 \pm 0.37$     | $12.37 \pm 0.25$     | $12.81 \pm 0.33$      | $12.64 \pm 0.19$     |
| $E_{\text{Elec+Solv(polar)}}$ | $-1,090.27 \pm 9.96$ | $-1,091.09 \pm 9.19$ | $-1,090.39 \pm 10.57$ | $-1,090.58 \pm 0.36$ |
| <b>H</b>                      | $-538.99 \pm 17.27$  | $-543.55 \pm 15.78$  | $-539.38 \pm 16.40$   | $-540.64 \pm 2.06$   |
| <b>-TS</b>                    | -140.61              | -159.87              | -160.02               | $-153.50 \pm 9.11$   |

**Table S14:** Binding free energy of **RBD-ACE2\_wt** binding. All energy values and standard errors are in kcal/mol.

| Energy Components             | RBD+ACE2_wt           | RBD                   | ACE2_wt              | $\Delta E$ |
|-------------------------------|-----------------------|-----------------------|----------------------|------------|
| $E_{\text{Elec}}$             | $-4,376.60 \pm 66.57$ | $-3,787.67 \pm 15.10$ | $-315.87 \pm 1.21$   | -273.05    |
| $E_{\text{Vdw}}$              | $-608.44 \pm 5.19$    | $-549.72 \pm 2.84$    | $-27.98 \pm 3.82$    | -30.74     |
| $E_{\text{Internal}}$         | $4,662.76 \pm 1.44$   | $4,072.15 \pm 0.71$   | $570.85 \pm 1.33$    | 19.77      |
| $E_{\text{Solv(polar)}}$      | $-2,706.20 \pm 63.68$ | $-2,229.61 \pm 8.91$  | $-721.89 \pm 3.76$   | 245.30     |
| $E_{\text{Solv(non-polar)}}$  | $76.35 \pm 0.21$      | $65.22 \pm 0.38$      | $12.73 \pm 0.25$     | -1.60      |
| $E_{\text{Elec+Solv(polar)}}$ | $-7,082.79 \pm 2.94$  | $-6,017.28 \pm 6.63$  | $-1,037.77 \pm 4.31$ | -27.44     |
| <b>H</b>                      | $-2,952.11 \pm 6.42$  | $-2,429.63 \pm 5.72$  | $-482.17 \pm 1.03$   | -40.31     |
| <b>-TS</b>                    | $-1,003.24 \pm 8.83$  | $-876.55 \pm 16.40$   | $-148.66 \pm 29.94$  | 21.97      |
| <b>G</b>                      |                       |                       |                      | -18.34     |

**Table S15:** Binding free energy of **RBD-ACE2\_mutant** binding. All energy values and standard errors are in kcal/mol.

| Energy Components             | RBD+ACE2_mutant       | RBD                   | ACE2_mutant          | $\Delta E$ |
|-------------------------------|-----------------------|-----------------------|----------------------|------------|
| $E_{\text{Elec}}$             | $-4,433.23 \pm 36.41$ | $-3,787.67 \pm 15.10$ | $-372.69 \pm 7.88$   | -272.86    |
| $E_{\text{Vdw}}$              | $-646.41 \pm 12.13$   | $-549.72 \pm 2.84$    | $-58.67 \pm 3.51$    | -38.03     |
| $E_{\text{Internal}}$         | $4,636.41 \pm 5.96$   | $4,072.15 \pm 0.71$   | $565.24 \pm 0.66$    | -0.98      |
| $E_{\text{Solv(polar)}}$      | $-2,942.74 \pm 33.05$ | $-2,229.61 \pm 8.91$  | $-975.79 \pm 7.60$   | 262.66     |
| $E_{\text{Solv(non-polar)}}$  | $75.69 \pm 0.90$      | $65.22 \pm 0.38$      | $12.75 \pm 0.23$     | -2.28      |
| $E_{\text{Elec+Solv(polar)}}$ | $-7,375.97 \pm 8.81$  | $-6,017.28 \pm 6.63$  | $-1,348.48 \pm 1.01$ | -10.20     |
| <b>H</b>                      | $-3,310.28 \pm 12.48$ | $-2,429.63 \pm 5.72$  | $-829.16 \pm 3.02$   | -51.50     |
| <b>-TS</b>                    | $-995.79 \pm 2.83$    | $-876.55 \pm 16.40$   | $-147.08 \pm 31.87$  | 27.83      |
| <b>G</b>                      |                       |                       |                      | -23.67     |

**Table S16:** Binding free energy of **RBD-ACE2\_al-al** binding. All energy values and standard errors are in kcal/mol.

| Energy Components             | RBD+ACE2_al-al        | RBD                   | ACE2_al-al           | $\Delta E$ |
|-------------------------------|-----------------------|-----------------------|----------------------|------------|
| $E_{\text{Elec}}$             | $-4,306.49 \pm 94.57$ | $-3,787.67 \pm 15.10$ | $-224.28 \pm 29.46$  | -294.54    |
| $E_{\text{Vdw}}$              | $-643.93 \pm 2.36$    | $-549.72 \pm 2.84$    | $-48.56 \pm 2.83$    | -45.65     |
| $E_{\text{Internal}}$         | $4,681.83 \pm 3.35$   | $4,072.15 \pm 0.71$   | $610.04 \pm 2.67$    | -0.36      |
| $E_{\text{Solv(polar)}}$      | $-2,730.28 \pm 88.13$ | $-2,229.61 \pm 8.91$  | $-788.83 \pm 22.70$  | 288.16     |
| $E_{\text{Solv(non-polar)}}$  | $75.25 \pm 0.53$      | $65.22 \pm 0.38$      | $12.92 \pm 0.30$     | -2.89      |
| $E_{\text{Elec+Solv(polar)}}$ | $-7,036.77 \pm 8.57$  | $-6,017.28 \pm 6.63$  | $-1,013.11 \pm 6.81$ | -6.38      |
| <b>H</b>                      | $-2,923.62 \pm 11.67$ | $-2,429.63 \pm 5.72$  | $-438.71 \pm 8.84$   | -55.28     |
| <b>-TS</b>                    | $-1006.26 \pm 13.40$  | $-876.55 \pm 16.40$   | $-153.12 \pm 11.62$  | 23.41      |
| <b>G</b>                      |                       |                       |                      | -31.87     |

**Table S17:** Binding free energy of **RBD-ACE2\_la-la** binding. All energy values and standard errors are in kcal/mol.

| Energy Components      | RBD+ACE2_la-la        | RBD                   | ACE2_la-la            | $\Delta E$ |
|------------------------|-----------------------|-----------------------|-----------------------|------------|
| $E_{Elec}$             | $-4,433.84 \pm 87.25$ | $-3,787.67 \pm 15.10$ | $-360.37 \pm 37.14$   | -285.80    |
| $E_{Vdw}$              | $-651.28 \pm 2.07$    | $-549.72 \pm 2.84$    | $-54.13 \pm 1.54$     | -47.43     |
| $E_{Internal}$         | $4,645.86 \pm 0.91$   | $4,072.15 \pm 0.71$   | $574.28 \pm 1.89$     | -0.57      |
| $E_{Solv(polar)}$      | $-2,761.36 \pm 85.94$ | $-2,229.61 \pm 8.91$  | $-803.82 \pm 26.18$   | 272.07     |
| $E_{Solv(non-polar)}$  | $74.81 \pm 0.46$      | $65.22 \pm 0.38$      | $12.83 \pm 0.23$      | -3.25      |
| $E_{Elec+Solv(polar)}$ | $-7,195.20 \pm 3.61$  | $-6,017.28 \pm 6.63$  | $-1,164.19 \pm 11.06$ | -13.73     |
| <b>H</b>               | $-3,125.82 \pm 5.46$  | $-2,429.63 \pm 5.72$  | $-631.21 \pm 11.83$   | -64.98     |
| <b>-TS</b>             | $-985.91 \pm 14.02$   | $-876.55 \pm 16.40$   | $-128.45 \pm 12.17$   | 19.08      |
| <b>G</b>               |                       |                       |                       | -45.90     |

**Table S18:** Binding free energy of **RBD-ACE2\_al-la** binding. All energy values and standard errors are in kcal/mol.

| Energy Components      | RBD+ACE2_al-la         | RBD                   | ACE2_al-la           | $\Delta E$ |
|------------------------|------------------------|-----------------------|----------------------|------------|
| $E_{Elec}$             | $-4,327.31 \pm 133.71$ | $-3,787.67 \pm 15.10$ | $-323.78 \pm 8.64$   | -215.85    |
| $E_{Vdw}$              | $-633.78 \pm 10.02$    | $-549.72 \pm 2.84$    | $-53.56 \pm 1.79$    | -30.50     |
| $E_{Internal}$         | $4,664.56 \pm 3.70$    | $4,072.15 \pm 0.71$   | $594.65 \pm 2.73$    | -2.23      |
| $E_{Solv(polar)}$      | $-2,793.93 \pm 129.76$ | $-2,229.61 \pm 8.91$  | $-773.83 \pm 10.82$  | 209.51     |
| $E_{Solv(non-polar)}$  | $75.90 \pm 1.05$       | $65.22 \pm 0.38$      | $12.56 \pm 0.10$     | -1.89      |
| $E_{Elec+Solv(polar)}$ | $-7,121.23 \pm 5.25$   | $-6,017.28 \pm 6.63$  | $-1,097.61 \pm 3.08$ | -6.34      |
| <b>H</b>               | $-3,014.55 \pm 12.80$  | $-2,429.63 \pm 5.72$  | $-543.96 \pm 2.48$   | -40.96     |
| <b>-TS</b>             | $-1002.32 \pm 14.83$   | $-876.55 \pm 16.40$   | $-134.09 \pm 23.35$  | 8.31       |
| <b>G</b>               |                        |                       |                      | -32.65     |

**Table S19:** Binding free energy of **RBD-ACE2\_la-al** binding. All energy values and standard errors are in kcal/mol.

| Energy Components      | RBD+ACE2_la-al        | RBD                   | ACE2_la-al           | $\Delta E$ |
|------------------------|-----------------------|-----------------------|----------------------|------------|
| $E_{Elec}$             | $-4,437.45 \pm 25.69$ | $-3,787.67 \pm 15.10$ | $-300.60 \pm 12.92$  | -349.18    |
| $E_{Vdw}$              | $-646.09 \pm 10.70$   | $-549.72 \pm 2.84$    | $-54.93 \pm 2.88$    | -41.44     |
| $E_{Internal}$         | $4,667.42 \pm 5.43$   | $4,072.15 \pm 0.71$   | $592.23 \pm 1.54$    | 3.05       |
| $E_{Solv(polar)}$      | $-2,683.09 \pm 33.62$ | $-2,229.61 \pm 8.91$  | $-789.99 \pm 13.22$  | 336.51     |
| $E_{Solv(non-polar)}$  | $75.22 \pm 0.69$      | $65.22 \pm 0.38$      | $12.64 \pm 0.19$     | -2.65      |
| $E_{Elec+Solv(polar)}$ | $-7,120.54 \pm 14.81$ | $-6,017.28 \pm 6.63$  | $-1,090.58 \pm 0.36$ | -12.67     |
| <b>H</b>               | $-3,023.98 \pm 7.42$  | $-2,429.63 \pm 5.72$  | $-540.64 \pm 2.06$   | -53.72     |
| <b>-TS</b>             | $-998.31 \pm 10.42$   | $-876.55 \pm 16.40$   | $-153.50 \pm 9.11$   | 31.74      |
| <b>G</b>               |                       |                       |                      | -21.98     |
